# Supplementary material for: Effect of lithium ions on the catalytic efficiency of calcium oxide as a nanocatalyst for the transesterification of lard oil
Source: Royal Society of Chemistry journal article supplement (doi:10.1039/c9se00210c), 2019-01-01
Supplement: c9se00210c1.pdf [file c9se00210c1.pdf]

## Effect of lithium ions in catalytic efficiency of calcium oxide as nanocatalyst for transesterification of lard oil

Indu Ambat <sup>a\*</sup>, Varsha Srivastava <sup>a</sup>, Esa Haapaniemi <sup>b</sup>, Mika Sillanpää <sup>a</sup>

<sup>a</sup>Department of Green Chemistry, School of Engineering Science, Lappeenranta University of Technology, Sammonkatu 12, FI-50130 Mikkeli, Finland

<sup>b</sup> Department of Organic Chemistry, University of Jyväskylä, Finland

\*Corresponding Author (email: indu.ambat@outlook.com)

### Supplementary materials

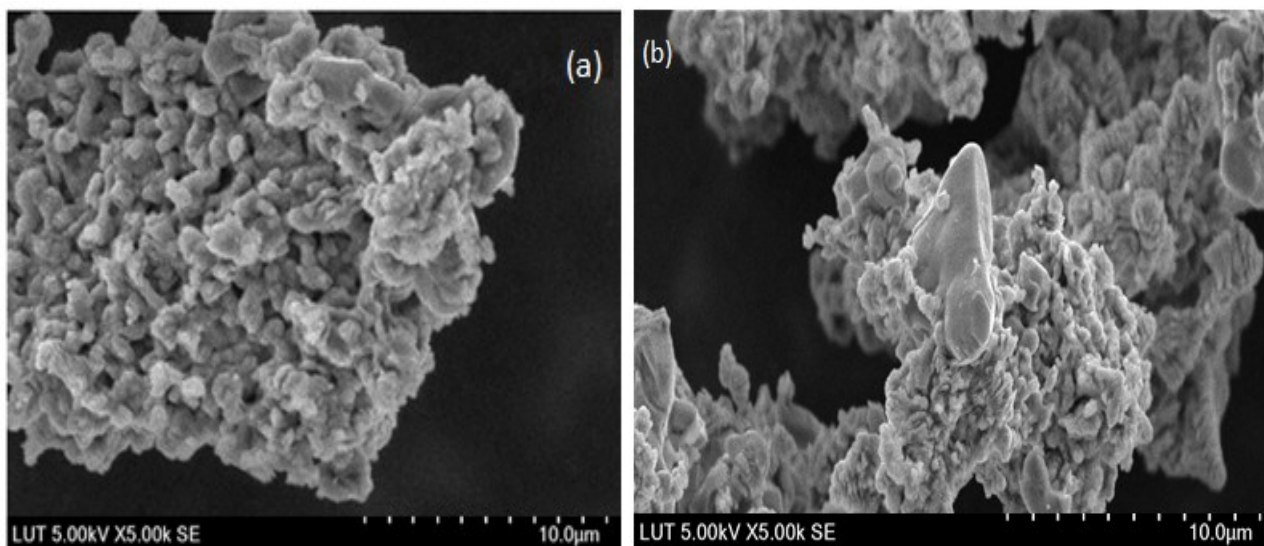

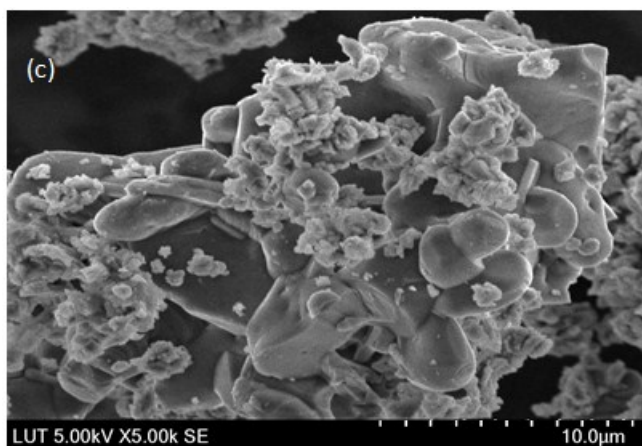

**Fig. S1.** SEM images of (a) CaO-0.15Li, (b)CaO-0.25Li, and (c)CaO-0.75Li

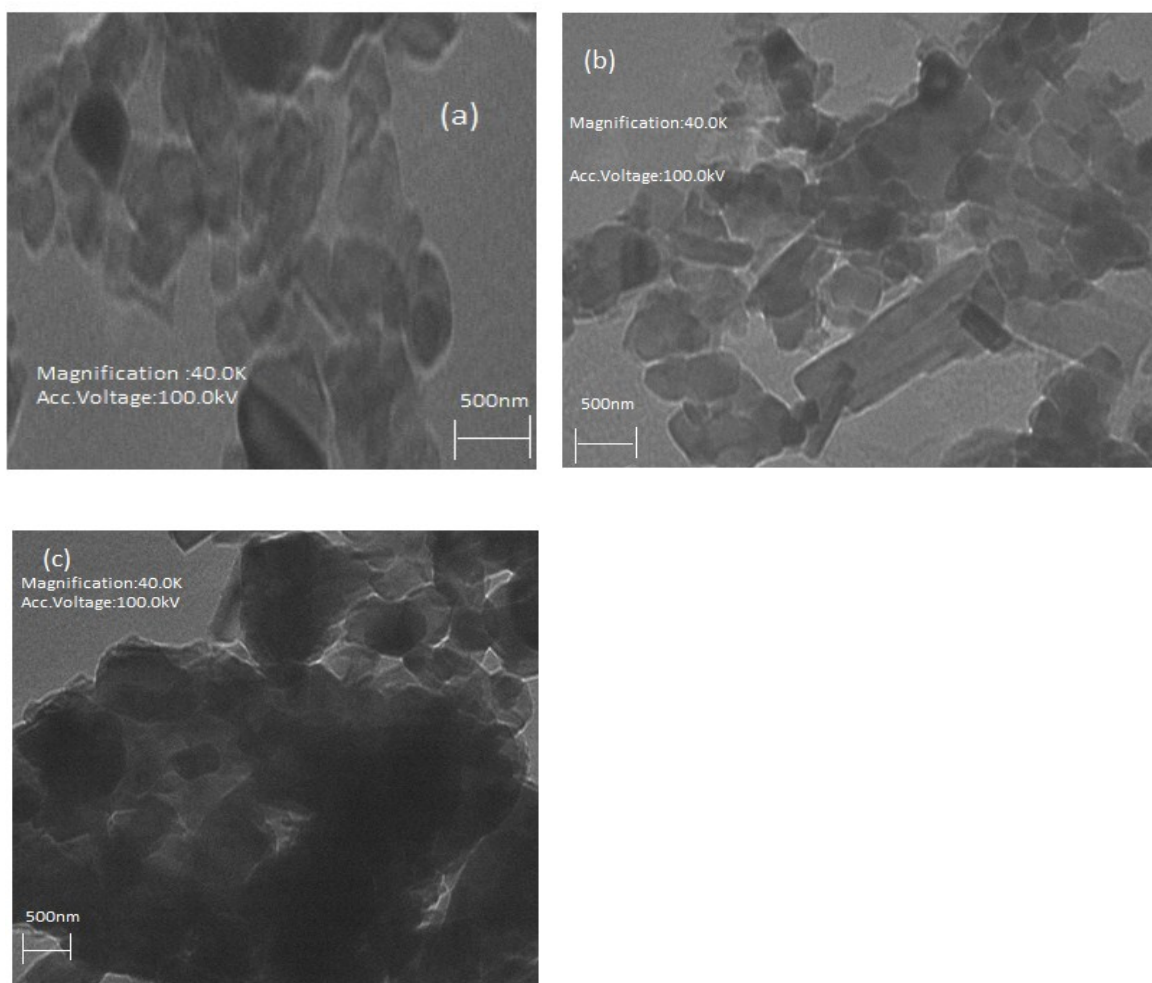

**Fig. S2.** TEM images of (a) CaO-0.15Li, (b) CaO-0.25Li, and (c)CaO-0.75Li
